# Supplementary material for: Stapling of the botulinum type A protease to growth factors and neuropeptides allows selective targeting of neuroendocrine cells
Source: PubMed Central journal article supplement (PMC3758956; doi:10.1111/jnc.12284), 2013-05-20

Arsenault *et al*, 'Stapling of the botulinum type A protease to growth factors and neuropeptides allows selective targeting of neuroendocrine cells'

**SUPPORTING INFORMATION:**

Supplementary figure 1: Immunoblot showing SNAP25 cleavage in E18 rat cortical neurons treated with the indicated stapled botulinum constructs as revealed using SMI81 antibody recognizing both intact and cleaved SNAP25.

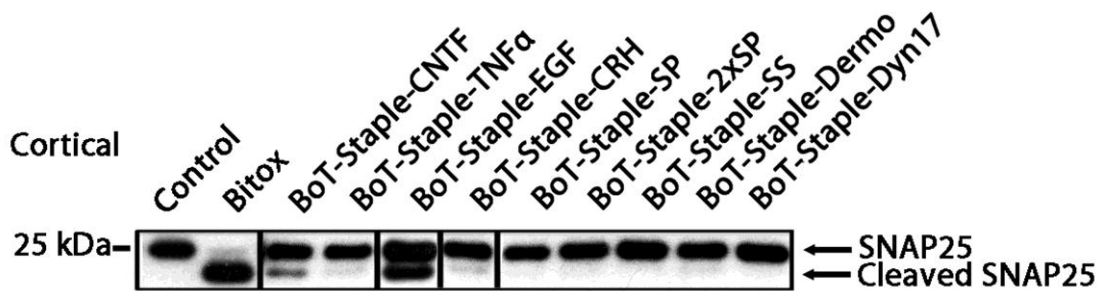

Supplementary figure 2: Bar chart showing similar  $^3\text{H}$ -catecholamine uptake (counts per minute, CPM) by PC12 cells (+/- SD) treated or not with the indicated botulinum molecules.

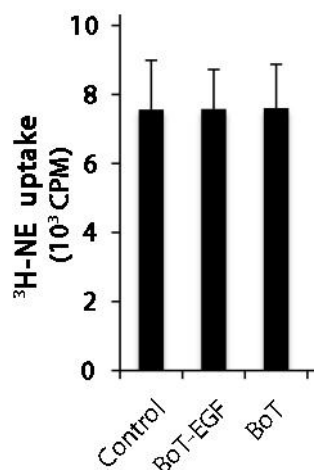

**Arsenault *et al*, 'Stapling of the botulinum type A protease to growth factors and neuropeptides allows selective targeting of neuroendocrine cells'**

Supplementary figure 3: A magnified region indicated by the white arrow in the panel 5a showing presence of cleaved SNAP25 in the 'neurosphere' following treatment with BoT-EGF. Neurons were immunostained with an anti-Map2ab (green) and the anti-cleaved SNAP25 (red) antibodies. Nuclear Hoechst staining is shown in blue. Horizontal bar: 50  $\mu$ m.

**Proliferating  
Neurosphere**

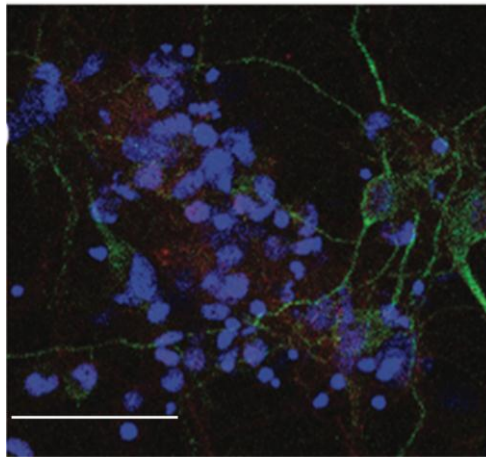

Supplement: jnc0126-0223-SD1.pdf [file jnc0126-0223-SD1.pdf]
